# Supplementary material for: Association of Wind Exposure and Air Pollution with Thyroid Eye Disease: First Nationwide Multicenter Evidence from China
Source: Research Square preprint supplement (doi:10.21203/rs.3.rs-8386894/v1), 2026-01-29
Supplement: Supplementary file 1 [file f3000c3e44600d991606239c.docx]

Supplementary Table 1. Collinearity analysis of independent variables using logistic regression model.

| **Variables** | **Tolerances** | **VIFs**a |
| --- | --- | --- |
| Sex | 0.755 | 1.325 |
| Age | 0.952 | 1.050 |
| Smoking | 0.768 | 1.302 |
| CO | 0.286 | 3.499 |
| SO2 | 0.388 | 2.579 |
| NO2 | 0.176 | 5.687 |
| O3 | 0.651 | 1.537 |
| PM₂.₅ | 0.119 | **8.375** |
| PM₁₀ | 0.133 | **7.509** |
| Temperature | 0.448 | 2.234 |
| Wind Speed | 0.524 | 1.907 |
| Light | 0.222 | 4.496 |
| Greenness | 0.223 | 4.481 |

a Variance inflation factors (VIFs) greater than 10 indicate strong multicollinearity between the independent variables, while VIFs between 5 and 10 suggest moderate multicollinearity. The VIFs for PM₂.₅ and PM₁₀ are 8.375 and 7.509, respectively, indicating moderate multicollinearity.

Supplementary Table 2. Pearson correlation coefficients among environmental variables.

|  | CO | SO2 | NO2 | O3 | **PM₂.₅** | PM₁₀ | Ta | WSb | Light |
| --- | --- | --- | --- | --- | --- | --- | --- | --- | --- |
| SO2 | 0.367 |  |  |  |  |  |  |  |  |
| NO2 | 0.639 | -0.017 |  |  |  |  |  |  |  |
| O3 | 0.179 | 0.042 | 0.395 |  |  |  |  |  |  |
| PM₂.₅ | 0.669 | 0.314 | 0.483 | 0.266 |  |  |  |  |  |
| **PM₁₀** | 0.561 | 0.420 | 0.444 | 0.382 | **0.895** |  |  |  |  |
| Ta | 0.035 | -0.495 | 0.133 | 0.190 | 0.006 | -0.103 |  |  |  |
| WSb | -0.304 | -0.148 | 0.039 | 0.181 | -0.391 | -0.275 | 0.194 |  |  |
| Light | 0.256 | -0.331 | 0.725 | 0.211 | 0.019 | 0.010 | 0.165 | 0.234 |  |
| Greenness | -0.362 | -0.030 | -0.730 | -0.320 | -0.256 | -0.332 | 0.170 | -0.265 | -0.720 |

a T denotes temperature;

b WS denotes wind speed.

**Supplementary Table 3. Subgroup analysis of environmental exposures associated with TED severity across age, sex, smoking status, and course of illness.**

| **Factors** | **Subgroup** | **Crude model** | | **Adjusted model** | |
| --- | --- | --- | --- | --- | --- |
| **OR(95%)** | **P** | **OR(95%)** | **P** |
| CO | Age≤55 | 1.080 (1.063, 1.097) | < 0.001 | 1.032 (1.004, 1.061) | 0.025 |
| Age＞55 | 1.060 (1.036, 1.085) | < 0.001 | 1.037 (0.997, 1.078) | 0.070 |
| Female | 1.075 (1.056, 1.094) | < 0.001 | 1.024 (0.994, 1.054) | 0.115 |
| Male | 1.070 (1.050, 1.091) | < 0.001 | 1.050 (1.014, 1.087) | 0.007 |
| Non-smokers | 1.074 (1.058, 1.091) | < 0.001 | 1.032 (1.007, 1.059) | 0.014 |
| Smokers | 1.063 (1.036, 1.091) | < 0.001 | 1.040 (0.988, 1.095) | 0.132 |
| course of illness ≤9months | 1.062 (1.040, 1.084) | < 0.001 | 1.020 (0.981, 1.060) | 0.327 |
| course of illness 9-18months | 1.086 (1.057, 1.116) | < 0.001 | 1.052 (1.008, 1.097) | 0.020 |
| course of illness ＞18months | 1.076 (1.054, 1.099) | < 0.001 | 1.027 (0.986, 1.069) | 0.199 |
| SO | Age≤55 | 1.308 (1.226, 1.396) | < 0.001 | 1.151 (1.026, 1.290) | 0.016 |
| Age＞55 | 1.177 (1.070, 1.295) | 0.001 | 0.914 (0.768, 1.088) | 0.313 |
| Female | 1.280 (1.187, 1.379) | < 0.001 | 1.142 (1.000, 1.304) | 0.050 |
| Male | 1.235 (1.143, 1.335) | < 0.001 | 0.992 (0.861, 1.142) | 0.908 |
| Non-smokers | 1.263 (1.186, 1.345) | < 0.001 | 1.092 (0.978, 1.219) | 0.117 |
| Smokers | 1.212 (1.090, 1.348) | < 0.001 | 1.057 (0.859, 1.301) | 0.602 |
| course of illness ≤9months | 1.226 (1.129, 1.331) | < 0.001 | 0.999 (0.866, 1.152) | 0.988 |
| course of illness 9-18months | 1.349 (1.195, 1.523) | < 0.001 | 1.330 (1.047, 1.689) | 0.020 |
| course of illness ＞18months | 1.264 (1.158, 1.380) | < 0.001 | 1.098 (0.929, 1.299) | 0.271 |
| NO2 | Age≤55 | 1.066 (1.048, 1.083) | < 0.001 | 1.145 (1.097, 1.195) | < 0.001 |
| Age＞55 | 1.057 (1.033, 1.081) | < 0.001 | 1.141 (1.075, 1.211) | < 0.001 |
| Female | 1.067 (1.048, 1.086) | < 0.001 | 1.140 (1.090, 1.192) | < 0.001 |
| Male | 1.058 (1.037, 1.079) | < 0.001 | 1.140 (1.080, 1.203) | < 0.001 |
| Non-smokers | 1.062 (1.046, 1.078) | < 0.001 | 1.120 (1.077, 1.164) | < 0.001 |
| Smokers | 1.058 (1.029, 1.088) | < 0.001 | 1.219 (1.132, 1.313) | < 0.001 |
| course of illness ≤9months | 1.053 (1.032, 1.075) | < 0.001 | 1.157 (1.089, 1.229) | < 0.001 |
| course of illness 9-18months | 1.085 (1.053, 1.118) | < 0.001 | 1.119 (1.045, 1.199) | 0.001 |
| course of illness ＞18months | 1.062 (1.040, 1.085) | < 0.001 | 1.161 (1.099, 1.226) | < 0.001 |
| O3 | Age≤55 | 1.014 (0.999, 1.030) | 0.070 | 0.974 (0.956, 0.993) | 0.007 |
| Age＞55 | 0.997 (0.976, 1.018) | 0.781 | 0.963 (0.937, 0.990) | 0.007 |
| Female | 1.014 (0.997, 1.031) | 0.101 | 0.975 (0.956, 0.995) | 0.015 |
| Male | 1.004 (0.985, 1.022) | 0.701 | 0.966 (0.943, 0.989) | 0.004 |
| Non-smokers | 1.016 (1.002, 1.031) | 0.027 | 0.984 (0.967, 1.002) | 0.073 |
| Smokers | 0.985 (0.963, 1.009) | 0.217 | 0.929 (0.897, 0.962) | < 0.001 |
| course of illness ≤9months | 1.025 (1.004, 1.047) | 0.018 | 1.000 (0.976, 1.025) | 0.996 |
| course of illness 9-18months | 1.034 (1.006, 1.063) | 0.019 | 0.983 (0.949, 1.019) | 0.350 |
| course of illness ＞18months | 0.989 (0.970, 1.007) | 0.236 | 0.942 (0.919, 0.966) | < 0.001 |
| PM₂.₅ | Age≤55 | 1.071 (1.053, 1.090) | < 0.001 | 1.028 (0.999, 1.058) | 0.063 |
| Age＞55 | 1.058 (1.031, 1.085) | < 0.001 | 1.076 (1.028, 1.127) | 0.002 |
| Female | 1.071 (1.051, 1.092) | < 0.001 | 1.058 (1.024, 1.093) | 0.001 |
| Male | 1.060 (1.037, 1.082) | < 0.001 | 1.017 (0.980, 1.055) | 0.380 |
| Non-smokers | 1.074 (1.056, 1.092) | < 0.001 | 1.056 (1.027, 1.086) | < 0.001 |
| Smokers | 1.041 (1.013, 1.070) | 0.004 | 1.009 (0.958, 1.062) | 0.738 |
| course of illness ≤9months | 1.055 (1.031, 1.080) | < 0.001 | 1.024 (0.982, 1.068) | 0.268 |
| course of illness 9-18months | 1.072 (1.040, 1.106) | < 0.001 | 1.027 (0.976, 1.081) | 0.311 |
| course of illness ＞18months | 1.074 (1.050, 1.098) | < 0.001 | 1.081 (1.036, 1.128) | < 0.001 |
| PM₁₀ | Age≤55 | 1.023 (1.014, 1.032) | < 0.001 | 0.990 (0.973, 1.007) | 0.239 |
| Age＞55 | 1.016 (1.003, 1.029) | 0.018 | 1.007 (0.980, 1.034) | 0.627 |
| Female | 1.020 (1.010, 1.030) | < 0.001 | 0.998 (0.979, 1.017) | 0.807 |
| Male | 1.021 (1.010, 1.032) | < 0.001 | 0.987 (0.965, 1.008) | 0.223 |
| Non-smokers | 1.022 (1.014, 1.030) | < 0.001 | 1.000 (0.984, 1.016) | 0.971 |
| Smokers | 1.013 (0.998, 1.027) | 0.094 | 0.982 (0.953, 1.013) | 0.254 |
| course of illness ≤9months | 1.017 (1.006, 1.029) | 0.003 | 0.993 (0.970, 1.017) | 0.573 |
| course of illness 9-18months | 1.023 (1.008, 1.038) | 0.003 | 0.984 (0.954, 1.014) | 0.294 |
| course of illness ＞18months | 1.024 (1.012, 1.036) | < 0.001 | 1.002 (0.978, 1.026) | 0.876 |
| Wind speed | Age≤55 | 1.024 (1.006, 1.042) | 0.009 | 1.109 (1.080, 1.138) | < 0.001 |
| Age＞55 | 1.025 (1.001, 1.049) | 0.045 | 1.147 (1.098, 1.199) | < 0.001 |
| Female | 1.024 (1.005, 1.044) | 0.015 | 1.125 (1.090, 1.161) | < 0.001 |
| Male | 1.025 (1.005, 1.046) | 0.015 | 1.110 (1.076, 1.146) | < 0.001 |
| Non-smokers | 1.023 (1.006, 1.039) | 0.007 | 1.110 (1.083, 1.137) | < 0.001 |
| Smokers | 1.031 (1.000, 1.062) | 0.049 | 1.182 (1.116, 1.251) | < 0.001 |
| course of illness ≤9months | 1.019 (0.998, 1.040) | 0.079 | 1.092 (1.058, 1.127) | < 0.001 |
| course of illness 9-18months | 1.038 (1.010, 1.066) | 0.007 | 1.122 (1.068, 1.180) | < 0.001 |
| course of illness ＞18months | 1.025 (0.997, 1.053) | 0.077 | 1.173 (1.122, 1.226) | < 0.001 |
| Light | Age≤55 | 1.000 (0.999, 1.001) | 0.963 | 0.998 (0.995, 1.000) | 0.073 |
| Age＞55 | 1.001 (1.000, 1.002) | 0.170 | 1.001 (0.997, 1.004) | 0.625 |
| Female | 1.001 (1.000, 1.002) | 0.118 | 1.001 (0.998, 1.003) | 0.644 |
| Male | 1.000 (0.998, 1.001) | 0.832 | 0.996 (0.992, 1.000) | 0.029 |
| Non-smokers | 1.001 (1.000, 1.002) | 0.277 | 1.000 (0.998, 1.002) | 0.995 |
| Smokers | 1.000 (0.998, 1.002) | 0.995 | 0.996 (0.991, 1.001) | 0.098 |
| course of illness ≤9months | 1.000 (0.999, 1.002) | 0.887 | 0.998 (0.995, 1.002) | 0.411 |
| course of illness 9-18months | 1.002 (1.000, 1.004) | 0.054 | 0.999 (0.995, 1.003) | 0.787 |
| course of illness ＞18months | 1.000 (0.999, 1.001) | 0.861 | 0.999 (0.996, 1.003) | 0.759 |
| Greenness | Age≤55 | 0.881 (0.775, 1.001) | 0.053 | 2.205 (1.598, 3.042) | < 0.001 |
| Age＞55 | 0.891 (0.747, 1.064) | 0.202 | 3.451 (2.078, 5.730) | < 0.001 |
| Female | 0.868 (0.758, 0.995) | 0.042 | 2.802 (1.966, 3.993) | < 0.001 |
| Male | 0.892 (0.760, 1.047) | 0.161 | 2.082 (1.374, 3.155) | 0.001 |
| Non-smokers | 0.884 (0.785, 0.996) | 0.042 | 2.534 (1.864, 3.445) | < 0.001 |
| Smokers | 0.898 (0.723, 1.115) | 0.329 | 3.035 (1.626, 5.664) | < 0.001 |
| course of illness ≤9months | 0.903 (0.765, 1.066) | 0.228 | 2.810 (1.783, 4.426) | < 0.001 |
| course of illness 9-18months | 0.717 (0.571, 0.899) | 0.004 | 1.834 (1.076, 3.126) | 0.026 |
| course of illness ＞18months | 0.952 (0.808, 1.122) | 0.558 | 3.230 (2.073, 5.034) | < 0.001 |
| Temperature | Age≤55 | 1.000 (0.996, 1.005) | 0.886 | 0.997 (0.989, 1.005) | 0.442 |
| Age＞55 | 0.998 (0.992, 1.004) | 0.435 | 0.981 (0.970, 0.992) | 0.001 |
| Female | 1.000 (0.996, 1.005) | 0.855 | 0.993 (0.985, 1.002) | 0.107 |
| Male | 0.998 (0.993, 1.003) | 0.483 | 0.991 (0.981, 1.000) | 0.053 |
| Non-smokers | 1.001 (0.997, 1.005) | 0.751 | 0.995 (0.987, 1.002) | 0.178 |
| Smokers | 0.997 (0.991, 1.004) | 0.415 | 0.984 (0.972, 0.997) | 0.014 |
| course of illness ≤9months | 0.996 (0.991, 1.001) | 0.136 | 0.983 (0.974, 0.993) | < 0.001 |
| course of illness 9-18months | 1.005 (0.996, 1.014) | 0.240 | 1.010 (0.994, 1.027) | 0.227 |
| course of illness ＞18months | 1.000 (0.995, 1.006) | 0.970 | 0.993 (0.983, 1.004) | 0.211 |

* Odds ratios (ORs) are expressed per unit increase: CO (per 1 ), SO₂, NO₂, O₃, PM₂.₅, PM₁₀ (per 10 ), temperature (per 0.1 ), wind speed (per 0.1 ), light (per 0.1 ), Greenness (per 0.1 unit).

Supplementary Table 4. Smoothing term statistics for wind speed on fT3, fT4, and TRAb levels derived from the generalized additive model.

| Model | Dependent Variable | Deviance explained | Number | edf | F | P-value |
| --- | --- | --- | --- | --- | --- | --- |
| Model 1a | fT3 | 4.12% | 1862 | 1.000 | 9.030 | 0.003 |
| Model 2b | fT4 | 4.02% | 1866 | 1.794 | 6.809 | < 0.001 |
| Model 3c | TRAb | 1.46% | 1644 | 1.000 | 0.044 | 0.830 |

a model for fT3 and Wind Speed

b model for fT4 and Wind Speed

c model for TRAb and Wind Speed
